# Supplementary material for: Proteomics of Bronchoalveolar Lavage Fluid Reveals a Lung Oxidative Stress Response in Murine Herpesvirus-68 Infection
Source: Preprints.org preprint supplement (doi:10.20944/preprints201809.0008.v1), 2018-09-03
Supplement: Supplementary file 3 [file supplementary]

**Supporting Information Table S1. Proteomics identification of proteins in BAL fluid.**

| Spot(s) | BAL Protein Identification                      | Symbol    | Accession <sup>1</sup> | Number of Peptides <sup>2</sup> | Mass Spectrometry <sup>3</sup> |           | Regulation <sup>4</sup> |           |
|---------|-------------------------------------------------|-----------|------------------------|---------------------------------|--------------------------------|-----------|-------------------------|-----------|
|         |                                                 |           |                        |                                 | M-Score                        | Z-score   | MHV68                   | MHV68/IL6 |
| 1       | $\alpha$ 1-acid glycoprotein B                  | A1AG1     | Q60590                 | 2                               | 109                            |           | 21.9                    | 19.4      |
| 2       | $\alpha$ 1-anti-trypsin (serpin A1)             | A1AT6     | P81105                 | 9                               | 298                            |           | 1.5                     | 1.6       |
| 3       | $\alpha$ 2-macroglobulin                        | A2MP      | Q6GQT1                 | 2                               | 25*                            |           | 1.3                     | 25.1      |
| 4       | $\alpha$ -2u-globulin (major urinary protein 6) | Mup6      | P02762                 | 8                               | 71-185                         |           | 2.3                     | 2.1       |
| 5       | Albumin                                         | Alb       | P07724                 | 15                              | n.s.                           | 2.87, 4%  | 0.8                     | 0.8       |
| 6       | Annexin A5                                      | Anxa5     | Q99LA1                 | 1-8                             | 44-186                         |           | 3.1                     | 3.5       |
| 7       | Apolipoprotein E                                | ApoE      | P08226                 | 14                              | n.d.                           | 2.16, 7%  | 1.5                     | 1.3       |
| 8       | Calcyclin                                       | S100a6    | A54314                 | 3                               | 83                             |           | 0.6                     | 0.6       |
| 9       | Clara cell protein 10                           | CC10      | Q06318                 | 1                               | 50                             |           | 0.8                     | 0.7       |
| 10      | Glutathione-S-transferase, mu1                  | GSTM1     | P10649                 | 1                               | 54                             |           | 2.0                     | 2.1       |
| 11      | Haptoglobin                                     | Hp        | Q63927                 | 7                               | 160                            |           | 0.6                     | 0.6       |
| 12      | Hydrocephalus-inducing protein [fgt.]           | Hydin     | Q80W93                 | 9                               | 43                             |           | 9.5                     | 9.5       |
|         | IL1 family member 10                            | IL1f10    | Q8R459                 | 4                               | n.d.                           | 2.44, 9%  |                         |           |
| 13      | Oxytocin receptor [fgt.]                        | OxtR      | P97926                 | 2                               | 25*                            |           | 1.1                     | 1.1       |
| 14      | Peroxiredoxin 2                                 | Pdx2      | Q61171                 | 14                              | 98                             |           | 1.3                     | 48.9      |
| 15      | Peroxiredoxin 6                                 | Pdx6      | O08709                 | 3-32'                           | 52-263                         |           | 5.9                     | 6.9       |
| 16      | Phospholipase A2, secreted                      | PLA2G12A  | Q9EPR2                 | 3                               | n.d.                           | 2.89, 14% | 21.0                    | 27.9      |
| 17      | Plasma retinol binding protein                  | RBP4      | Q6T898                 | 2                               | 96                             | 2.17, 8%  | 23.6                    | 55.9      |
| 18      | Retinoic acid binding protein 2 [isoform]       | CRABP2    | P22935                 | 1-2                             | 81-83                          |           | 1.3                     | 53.1      |
| 19      | Superoxide dismutase 3, extracellular           | EC-SOD    | P08228                 | 1-4                             | 76-163                         | 3.12, 15% | 3.9                     | 82.4      |
| 20      | Thioredoxin-like 4B                             | TXNL4B    | Q8BUH1                 | 4                               | n.d.                           | 3.42, 15% | 1.3                     | 21.0      |
| 21      | TNF $\alpha$ -induced protein 8-like 2          | Tnfaip8l2 | Q9D8Y7                 | 2                               | 23*                            |           | 5.1                     | 5.1       |
| 22      | Transthyretin [major form]                      | TTR       | Q9D6A4                 | 3-12                            | 84-188                         |           | 8.8                     | 10.1      |

**Regulation Key**

|                       |
|-----------------------|
| suppressed            |
| no significant change |
| weakly induced        |
| strongly induced      |

**Notes:**

- 1 UniProt Accession number (*Mus musculus*).
- 2 Number of matching peptides in mass spectrometry; range indicated for multiple spots/detections.
- 3 LC/MS-MS with highest individual Mascot peptide score:  $M > 38$ ,  $p < 0.05$  (significant);  $38 > M > 23$ ,  $p < 0.10$  (\*marginal significance); or MALDI with associated Z-score and % peptide sequence coverage by *Aldente*. n.d., not detected; n.s., not significant.
- 4 Ratio of each protein's total 2D PAGE spot density to DMEM for WT MHV-68 or MHV68/IL6 9d.p.i. in mouse BAL; normalized to average oxytocin-receptor and albumin; regulation indicated.

**Supporting Information Table S2. PCR Primers Used in This Study**

| Mouse <i>or</i> Viral Gene                           | Symbol | Primer Sequences [5' to 3'] |                           |
|------------------------------------------------------|--------|-----------------------------|---------------------------|
|                                                      |        | <i>Forward</i>              | <i>Reverse</i>            |
| <b>MHV-68 Genome</b>                                 | ORF65  | GTCAGGGCCCCAGTCCGTA         | TGGCCCTCTACCTTCTGTTGA     |
|                                                      | ORF57  | ACTGAAACCTCGCAGAGGTCC       | GCACGGTGCAATGTGTCACAG     |
| <b>Actin</b>                                         | Actin  | CACCCACACTGTGCCCATCTAC      | GTGAGGATCTTCATGAGGTAGTC   |
| <b>Glutathione peroxidase 3</b>                      | Gpx3   | GATCCTCCGGGCATCCTGCCTTCTC   | TCGAACATACTTGAGACTGGGGAGT |
| <b>Nitric oxide synth. 2, inducible</b>              | iNOS   | CTTTGTGCGGAGTGTCAGTGG       | TTCTTCCTGATAGAGGTGGTCC    |
|                                                      |        | ACATCGACCCGTCCACAGTAT       | CAGAGGGGTAGGCTTGTCTC      |
| <b>Peroxiredoxin 6</b>                               | Pdx6   | CGCCAGAGTTTGCCAAGAG         | TCCGTGGGTGTTTCACCATTG     |
|                                                      |        | TTGATGATAAGGGCAGGGAC        | CTACCATCACGCTCTCTCCC      |
| <b>Retinoic acid b. protein 4</b>                    | RBP4   | TGCGTTCAGGAGTGATCAAG        | CCATGTCTGCACACACTTCC      |
| <b>Superoxide dismutase 3</b>                        | SOD3   | TTGTTCTACGGCTTGCTACTGGC     | ATTGCATGCATCTCGGCAGC      |
|                                                      |        | AGGTGGATGCTGCCGAGAT         | TCCAGACTGAAATAGGCCTCAAG   |
|                                                      |        | GGTTGAGAAGATAGGCGACAC       | CGTGGCTGATGGTTGTACC       |
| <b>Thioredoxin 1</b>                                 | Trx1   | CTGGTTCTGCTGAGACGCGT        | AGAGGGAATGGAAGAAGGGCT     |
| <b>TNF<math>\alpha</math>-induced prot. 8-like 2</b> | TIPE2  | TTACCGCGTGTCCAAAGAA         | AGTCCACCTCACCGAAGCTA      |
| <b>Transthyretin</b>                                 | TTR    | TGTCTCTGATGGTCAAAGTCCT      | CTGCGATGGTGTAGTGGCGAT     |
