# Supplementary material for: Proteomics of Bronchoalveolar Lavage Fluid Reveals a Lung Oxidative Stress Response in Murine Herpesvirus-68 Infection
Source: Preprints.org preprint supplement (doi:10.20944/preprints201809.0008.v1), 2018-09-03
Supplement: Supplementary file 4 [file supplementary]

**Fig. S1** (Supporting Information).

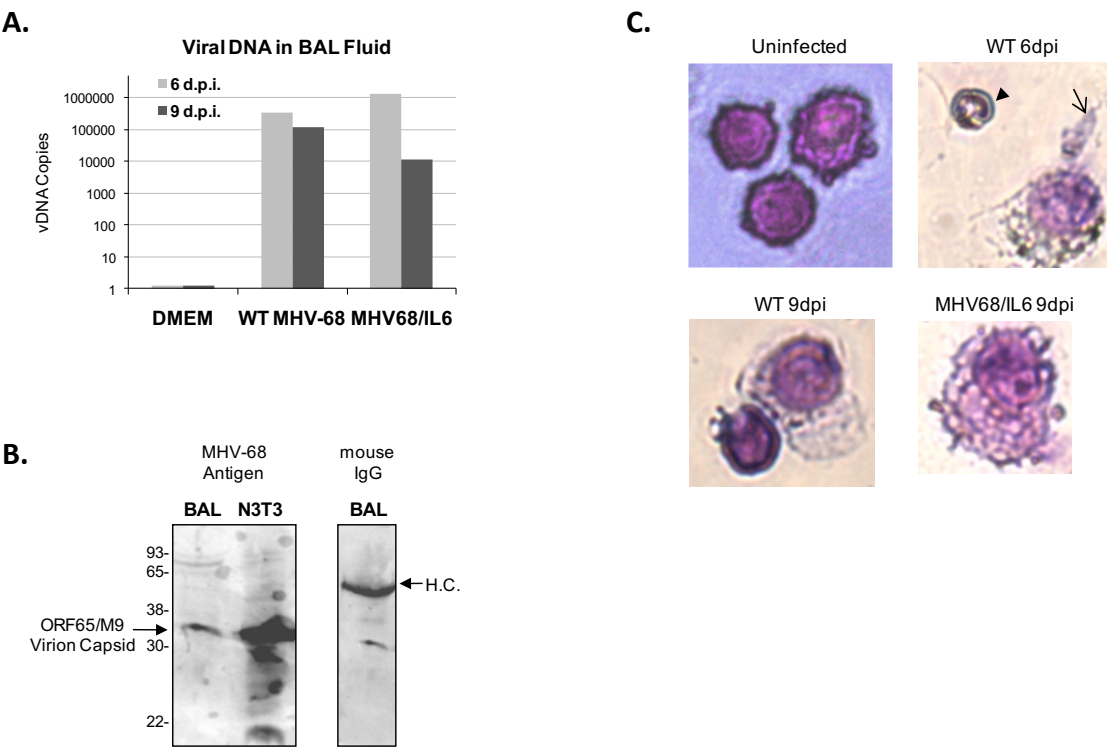

Fig. S2 (Supporting Information).

**Mascot Search Results**

**Protein View**

Match to: **Q6A0D0\_MOUSE** Score: **263**  
MKIAA0106 protein (Fragment).- Mus musculus (Mouse).

Nominal mass (M<sub>r</sub>): **25168**; Calculated pI value: **5.97**  
NCBI BLAST search of **Q6A0D0\_MOUSE** against nr  
Taxonomy: **Mus musculus**  
Fixed modifications: Carbamidomethyl (C)  
Variable modifications: Oxidation (M)  
Cleavage by Trypsin: cuts C-term side of KR unless next residue is P  
Sequence Coverage: **32%**

Matched peptides shown in **Bold Red**

1 TAAMPGGLLL GDEAPNFAN TTIGIRIFHD FLGDSWGILF SHPRDFTPVC  
51 TTELGRAAKL APEFAKRNVK LIALSIDSVS DHLAWSK**DIN AYNGETPTEK**  
101 **LPFFIIDDKG RDLAILLGML DPVEKDANNM PVTARVVVFIF GPDKKLKLSI**  
151 **LYPATTTGRNF DEILRVVDSL QLTGTPVAT PVDWKKGESV MVTPTLSEEE**  
201 AKQCFPGKVF TKELPSGKKY LRYTPQP

| Start - End | Observed | Mr(expt)  | Mr(calc)  | Delta   | Miss | Sequence                                                     |
|-------------|----------|-----------|-----------|---------|------|--------------------------------------------------------------|
| 88 - 100    | 726.7283 | 1451.4421 | 1450.6576 | 0.7845  | 0    | K.DINAYNETPTEK.L (Ions score 31)                             |
| 88 - 100    | 726.7283 | 1451.4421 | 1450.6576 | 0.7845  | 0    | K.DINAYNETPTEK.L (Ions score 11)                             |
| 101 - 109   | 529.2186 | 1056.4227 | 1056.5855 | -0.1628 | 0    | K.LPFFIIDDK.G (Ions score 51)                                |
| 112 - 125   | 771.8106 | 1541.6067 | 1541.8374 | -0.2307 | 0    | R.DLAILLGMLDPVEK.D Oxidation (M) (Ions score 92)             |
| 112 - 135   | 876.9840 | 2627.9302 | 2627.3298 | 0.6004  | 1    | R.DLAILLGMLDPVEKDANNMPVTAR.V 2 Oxidation (M) (Ions score 43) |
| 136 - 145   | 575.7542 | 1149.4938 | 1148.6593 | 0.8345  | 1    | R.VVFIIFGPKK.L (Ions score 7)                                |
| 148 - 165   | 693.6130 | 2077.8172 | 2078.1160 | -0.2988 | 1    | K.LSILYPATTTGRNFDEILR.V (Ions score 38)                      |

**Peptide View**

MS/MS Fragmentation of **DLAILLGMLDPVEK**  
Found in **Q53ZU7\_MOUSE, Peroxiredoxin 6.- Mus musculus (Mouse)**.  
Found in **Q6A0D0\_MOUSE, MKIAA0106 protein (Fragment).- Mus musculus (Mouse)**.  
Match to Query I15: 1541.606730 from(771.810641,2+)  
Title: File: sbRENSUN051506\_EB5-2.wiff, Sample: Eric5-2 (sample number 1), Elution: 45.66 min, Period: 1, Cycle(s): 2235 (Experiment 2)  
Data file E:\Temp\mas11.tmp

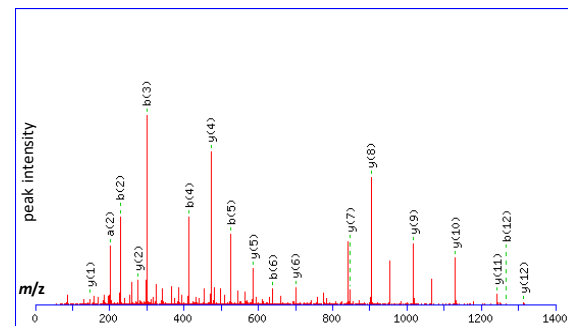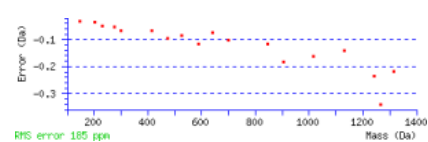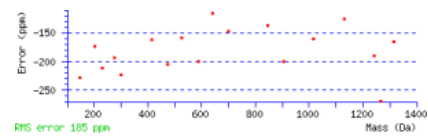

Monoisotopic mass of neutral peptide Mr(calc): 1541.8374  
Fixed modifications: Carbamidomethyl (C) (apply to specified residues or termini only)  
Variable modifications:  
M8 : Oxidation (M)  
Ions Score: 92 Expect: 1.9e-07  
Matches : 18/104 fragment ions using 26 most intense peaks

| #  | a         | a <sup>+</sup> | b         | b <sup>+</sup> | Seq. | y         | y <sup>+</sup> | y <sup>*</sup> | y <sup>++</sup> | #  |
|----|-----------|----------------|-----------|----------------|------|-----------|----------------|----------------|-----------------|----|
| 1  | 88.0393   | 44.5233        | 116.0342  | 58.5207        | D    |           |                |                |                 | 14 |
| 2  | 201.1234  | 101.0653       | 229.1183  | 115.0628       | L    | 1427.8178 | 714.4125       | 1410.7912      | 705.8992        | 13 |
| 3  | 272.1605  | 136.5839       | 300.1554  | 150.5813       | A    | 1314.7337 | 657.8705       | 1297.7072      | 649.3572        | 12 |
| 4  | 385.2445  | 193.1259       | 413.2394  | 207.1234       | I    | 1243.6966 | 622.3519       | 1226.6701      | 613.8387        | 11 |
| 5  | 498.3286  | 249.6679       | 526.3235  | 263.6654       | L    | 1130.6125 | 565.8099       | 1113.5860      | 557.2966        | 10 |
| 6  | 611.4127  | 306.2100       | 639.4076  | 320.2074       | L    | 1017.5285 | 509.2679       | 1000.5019      | 500.7546        | 9  |
| 7  | 668.4341  | 334.7207       | 696.4290  | 348.7182       | G    | 904.4444  | 452.7258       | 887.4179       | 444.2126        | 8  |
| 8  | 815.4695  | 408.2384       | 843.4644  | 422.2359       | M    | 847.4230  | 424.2151       | 830.3964       | 415.7018        | 7  |
| 9  | 928.5536  | 464.7804       | 956.5485  | 478.7779       | L    | 700.3876  | 350.6974       | 683.3610       | 342.1841        | 6  |
| 10 | 1043.5805 | 522.2939       | 1071.5754 | 536.2914       | D    | 587.3035  | 294.1554       | 570.2770       | 285.6421        | 5  |
| 11 | 1140.6333 | 570.8203       | 1168.6282 | 584.8177       | P    | 472.2766  | 236.6419       | 455.2500       | 228.1286        | 4  |
| 12 | 1239.7017 | 620.3545       | 1267.6966 | 634.3519       | V    | 375.2238  | 188.1155       | 358.1973       | 179.6023        | 3  |
| 13 | 1368.7443 | 684.8758       | 1396.7392 | 698.8732       | E    | 276.1554  | 138.5813       | 259.1288       | 130.0681        | 2  |
| 14 |           |                |           |                | K    | 147.1128  | 74.0600        | 130.0863       | 65.5468         | 1  |

**All matches to this query**

| Score | Mr(calc): | Delta   | Sequence        |
|-------|-----------|---------|-----------------|
| 92.2  | 1541.8374 | -0.2307 | DLAILLGMLDPVEK  |
| 9.3   | 1541.8664 | -0.2597 | GLELSKAIEDNK    |
| 8.9   | 1540.9592 | 0.6475  | VTVLLILVSWSLAK  |
| 8.8   | 1542.8268 | -1.2201 | HTTWIMYIFAR     |
| 8.4   | 1541.8202 | -0.2134 | LWLPTASVSPSOTR  |
| 8.2   | 1542.8114 | -1.2047 | QATLLSHSTSSORK  |
| 8.1   | 1542.7638 | -1.1570 | LQEFEDLDLERR    |
| 7.2   | 1541.7362 | -0.1294 | AQWGSSDATPELPAL |
| 5.6   | 1541.7586 | -0.1519 | DLGTASHNFGSALPR |
| 4.3   | 1541.8241 | -0.2174 | QVAFHIPFEVVEK   |

**Fig. S3** (Supporting Information).

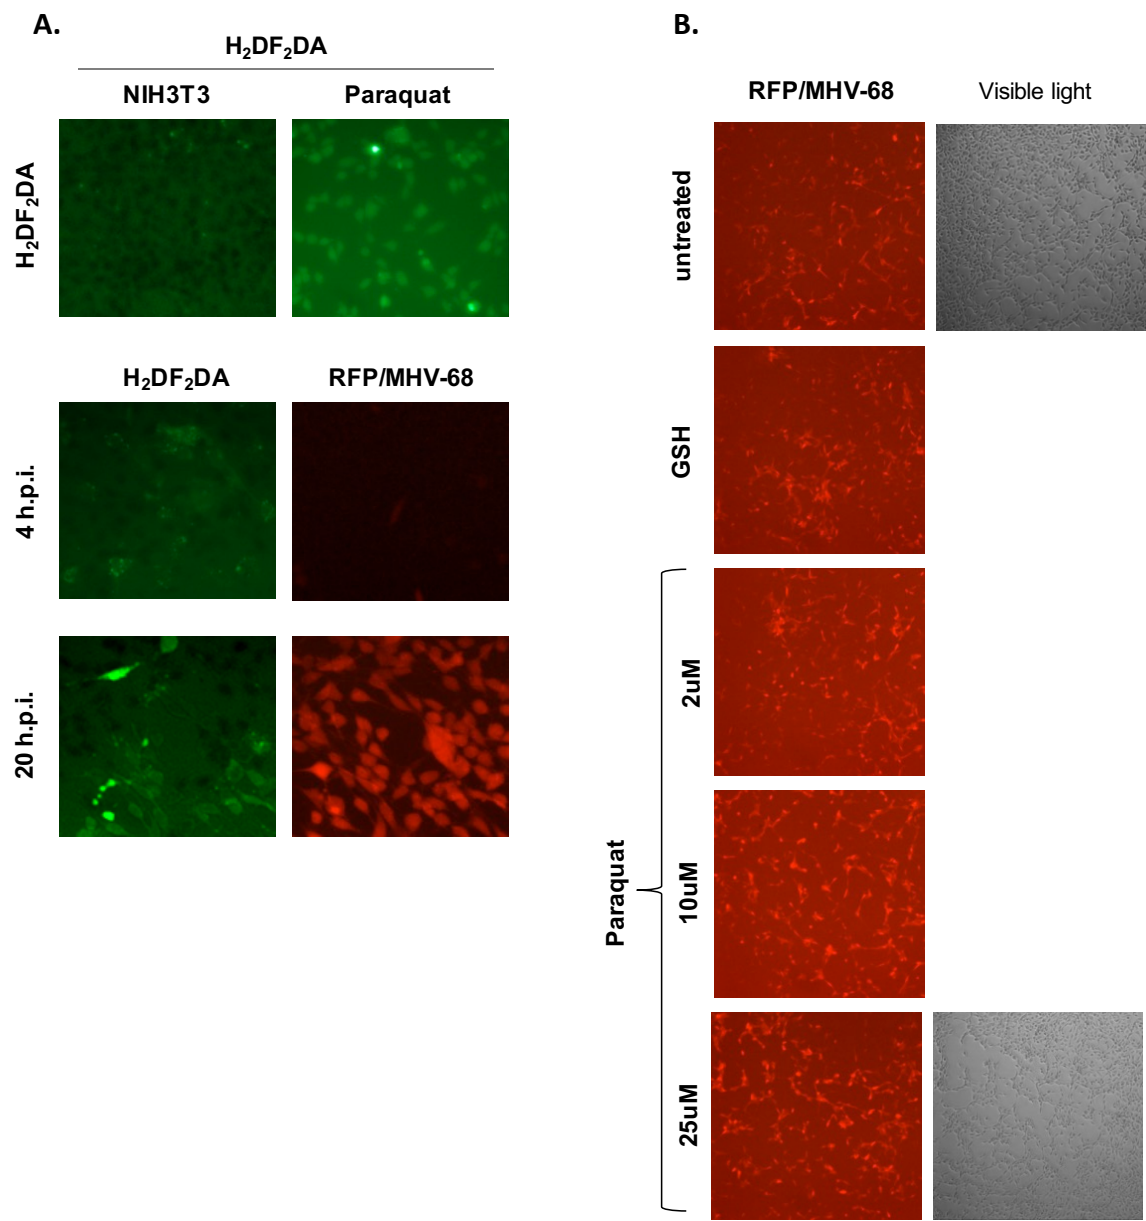

**Fig. S4** (Supporting Information).
